# Supplementary material for: Polymorphism and solid solutions of trimethylammonium monocarboranes
Source: Royal Society of Chemistry journal article supplement (doi:10.1039/d2dt02513b), 2022-01-01
Supplement: d2dt02513b1.pdf [file d2dt02513b1.pdf]

## **Supporting Information: Polymorphism and solid solutions of trimethylammonium monocarboranes**

*Jakob B. Grinderslev<sup>1</sup>, Lasse N. Skov<sup>1</sup>, Daniel R. Sørensen<sup>1,2</sup>, Innokenty Kantor<sup>2,3</sup>, Mads R. V. Jørgensen<sup>1,2</sup>, Torben R. Jensen<sup>1,\*</sup>*

<sup>1</sup> Interdisciplinary Nanoscience Center (iNANO) and Department of Chemistry, Aarhus University, Langelandsgade 140, DK-8000 Aarhus C, Denmark

<sup>2</sup> MAX IV laboratory, Lund University, Fotongatan 2, SE 211 00 Lund, Sweden

<sup>3</sup> Department of Physics, The Technical University of Denmark, Fysikvej 3, DK-2880 Kgs. Lyngby, Denmark

\* Corresponding author: [trj@chem.au.dk](mailto:trj@chem.au.dk), Tel: +45 8942 3894

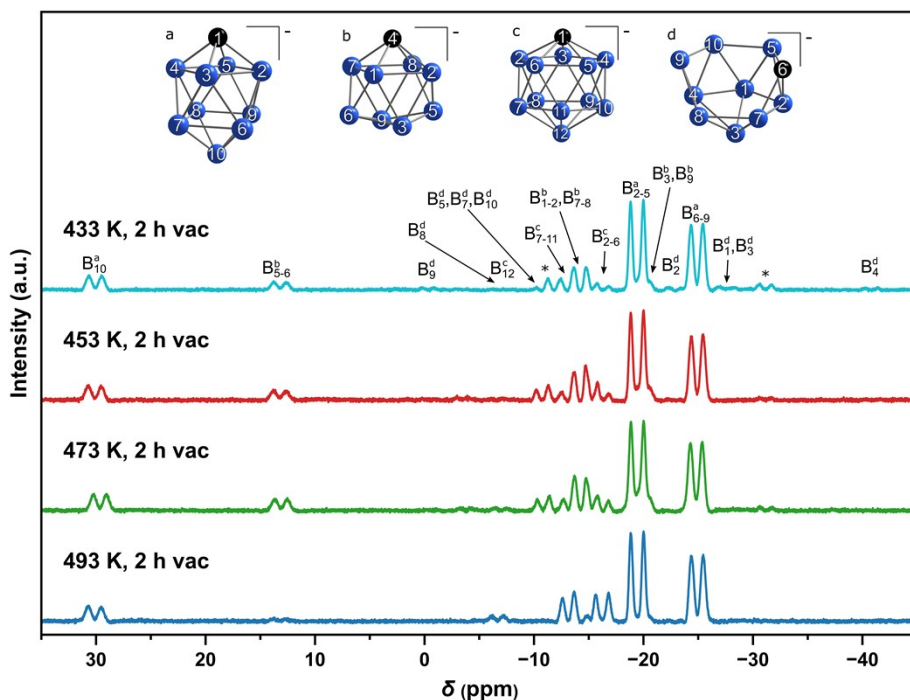

**Figure S1.**  $^{11}\text{B}$  NMR spectra of  $[\text{NH}(\text{CH}_3)_3][\text{arachno-6-CH}_2\text{B}_9\text{H}_{12}]$  (d) heated to either  $T = 433$ , 453, 473 or 493 K for 2 hours under dynamic vacuum, resulting in solid solutions of  $[\text{NH}(\text{CH}_3)_3][(\text{CB}_8\text{H}_9)_x(\text{CB}_9\text{H}_{10})_y(\text{CB}_{11}\text{H}_{12})_z]$ , containing the anions  $[\text{closo-1-CB}_9\text{H}_{10}]^-$ ,  $[\text{closo-4-CB}_8\text{H}_9]^-$  and  $[\text{closo-1-CB}_{11}\text{H}_{12}]^-$ , denoted a, b and c, respectively. ‘\*’ marks unknown B-species.

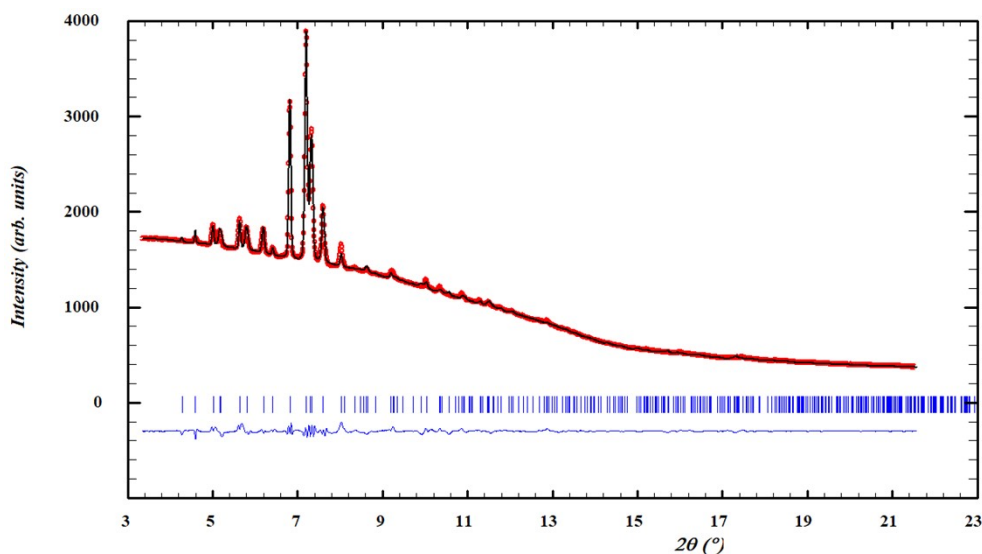

**Figure S2.** Rietveld refinement of the structural model of  $\alpha\text{-}[\text{NH}(\text{CH}_3)_3][\text{CB}_9\text{H}_{10}]$  from SR PXRD data measured at  $T = 273$  K,  $\lambda = 0.6063$  Å, showing experimental (red circles) and calculated (black line) PXRD patterns, and a difference plot below (blue line). Final discrepancy factors:  $R_p = 0.756\%$ ,  $R_{wp} = 1.07\%$ ,  $R_{exp} = 0.08\%$  (not corrected for background),  $R_p = 17.3\%$ ,  $R_{wp} = 11.0\%$

%,  $R_{\text{exp}} = 0.77\%$  (conventional Rietveld R-factors),  $R_{\text{Bragg}}(\alpha\text{-[NH(CH}_3)_3\text{][CB}_9\text{H}_{10}\text{]}) = 9.80\%$  and global  $\chi^2 = 203$ .

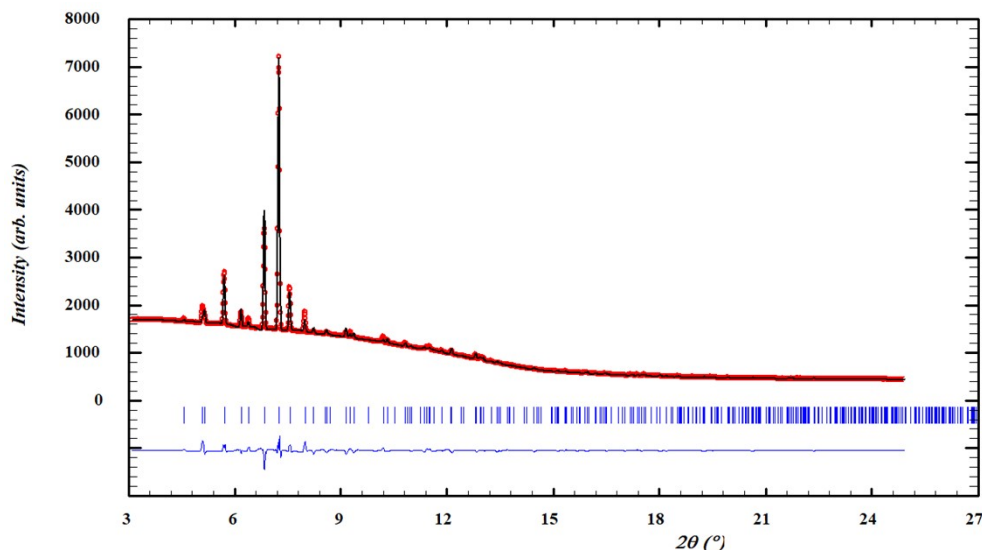

**Figure S3.** Rietveld refinement of the structural model of  $\beta\text{-[NH(CH}_3)_3\text{][CB}_9\text{H}_{10}\text{]}$  from SR PXRD data measured at  $T = 293\text{ K}$ ,  $\lambda = 0.6063\text{ \AA}$ , showing experimental (red circles) and calculated (black line) PXRD patterns, and a difference plot below (blue line). Final discrepancy factors:  $R_p = 1.03\%$ ,  $R_{\text{wp}} = 1.63\%$ ,  $R_{\text{exp}} = 0.08\%$  (not corrected for background),  $R_p = 23.7\%$ ,  $R_{\text{wp}} = 13.6\%$ ,  $R_{\text{exp}} = 0.66\%$  (conventional Rietveld R-factors),  $R_{\text{Bragg}}(\beta\text{-[NH(CH}_3)_3\text{][CB}_9\text{H}_{10}\text{]}) = 12.6\%$  and global  $\chi^2 = 422$ .

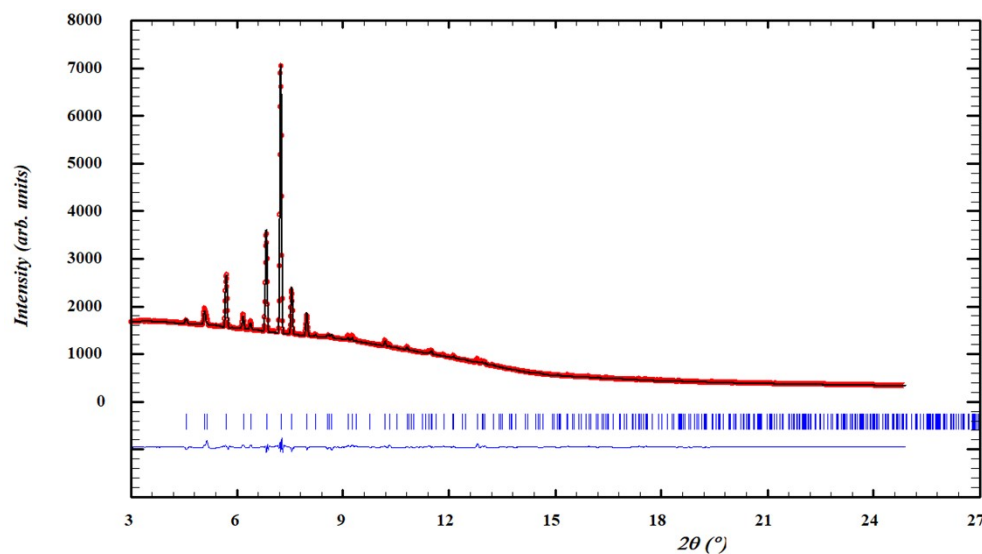

**Figure S4.** Rietveld refinement of the disordered structural model of  $\beta\text{-[NH(CH}_3)_3\text{][CB}_9\text{H}_{10}\text{]}$  from SR PXRD data measured at  $T = 293\text{ K}$ ,  $\lambda = 0.6063\text{ \AA}$ , showing experimental (red circles) and calculated (black line) PXRD patterns, and a difference plot below (blue line). Final discrepancy factors:  $R_p = 0.799\%$ ,  $R_{\text{wp}} = 1.20\%$ ,  $R_{\text{exp}} = 0.08\%$  (not corrected for background),  $R_p = 19.5\%$ ,

$R_{wp} = 9.97\%$ ,  $R_{exp} = 0.67\%$  (conventional Rietveld R-factors),  $R_{Bragg}(\beta\text{-[NH(CH}_3)_3][\text{CB}_9\text{H}_{10}]) = 10.4\%$  and global  $\chi^2 = 224$ .

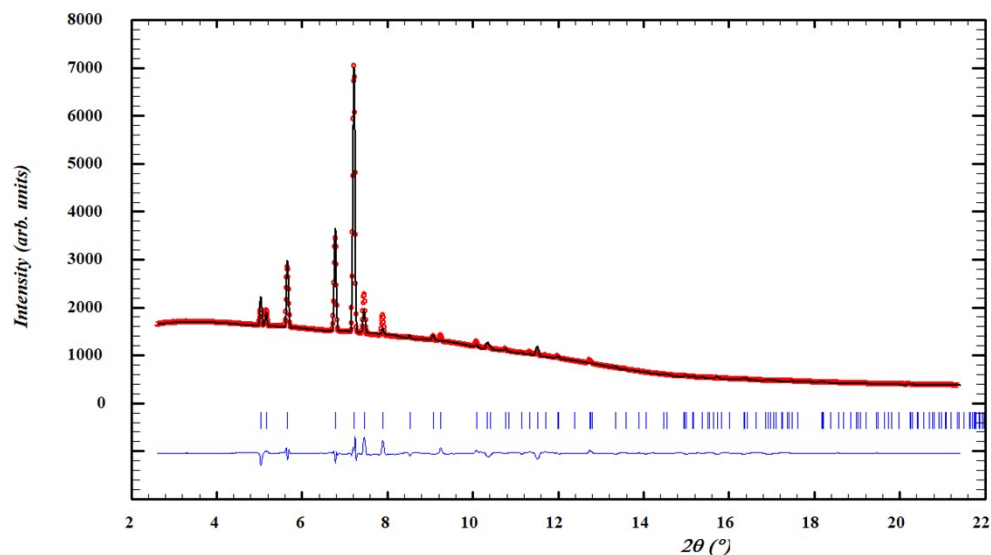

**Figure S5.** Rietveld refinement of the structural model of  $\gamma\text{-[NH(CH}_3)_3][\text{CB}_9\text{H}_{10}]$  from SR PXRD data measured at  $T = 340\text{ K}$ ,  $\lambda = 0.6063\text{ \AA}$ , showing experimental (red circles) and calculated (black line) PXRD patterns, and a difference plot below (blue line). Final discrepancy factors:  $R_p = 1.42\%$ ,  $R_{wp} = 2.35\%$ ,  $R_{exp} = 0.08\%$  (not corrected for background),  $R_p = 30.3\%$ ,  $R_{wp} = 18.7\%$ ,  $R_{exp} = 0.60\%$  (conventional Rietveld R-factors),  $R_{Bragg}(\gamma\text{-[NH(CH}_3)_3][\text{CB}_9\text{H}_{10}]) = 14.7\%$  and global  $\chi^2 = 972$ .

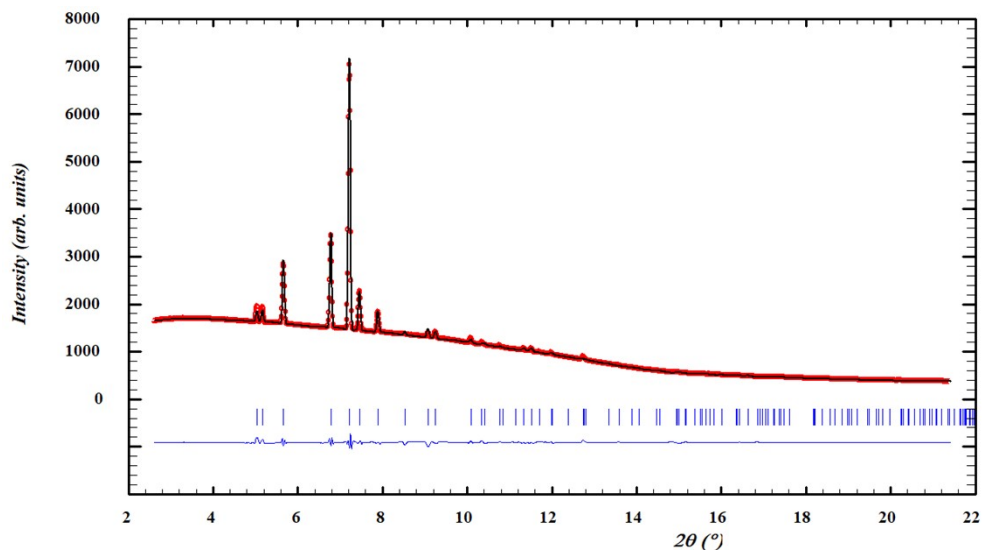

**Figure S6.** Rietveld refinement of the disordered structural model of  $\gamma\text{-[NH(CH}_3)_3][\text{CB}_9\text{H}_{10}]$  from SR PXRD data measured at  $T = 340\text{ K}$ ,  $\lambda = 0.6063\text{ \AA}$ , showing experimental (red circles) and calculated (black line) PXRD patterns, and a difference plot below (blue line). Final discrepancy factors:  $R_p = 1.42\%$ ,  $R_{wp} = 2.35\%$ ,  $R_{exp} = 0.08\%$  (not corrected for background),  $R_p = 30.3\%$ ,  $R_{wp} = 18.7\%$ ,  $R_{exp} = 0.60\%$  (conventional Rietveld R-factors),  $R_{Bragg}(\gamma\text{-[NH(CH}_3)_3][\text{CB}_9\text{H}_{10}]) = 14.7\%$  and global  $\chi^2 = 972$ .

factors:  $R_p = 0.742\%$ ,  $R_{wp} = 1.11\%$ ,  $R_{exp} = 0.08\%$  (not corrected for background),  $R_p = 16.4\%$ ,  $R_{wp} = 8.85\%$ ,  $R_{exp} = 0.60\%$  (conventional Rietveld R-factors),  $R_{Bragg}(\gamma\text{-}[\text{NH}(\text{CH}_3)_3][\text{CB}_9\text{H}_{10}]) = 5.52\%$  and global  $\chi^2 = 217$ .

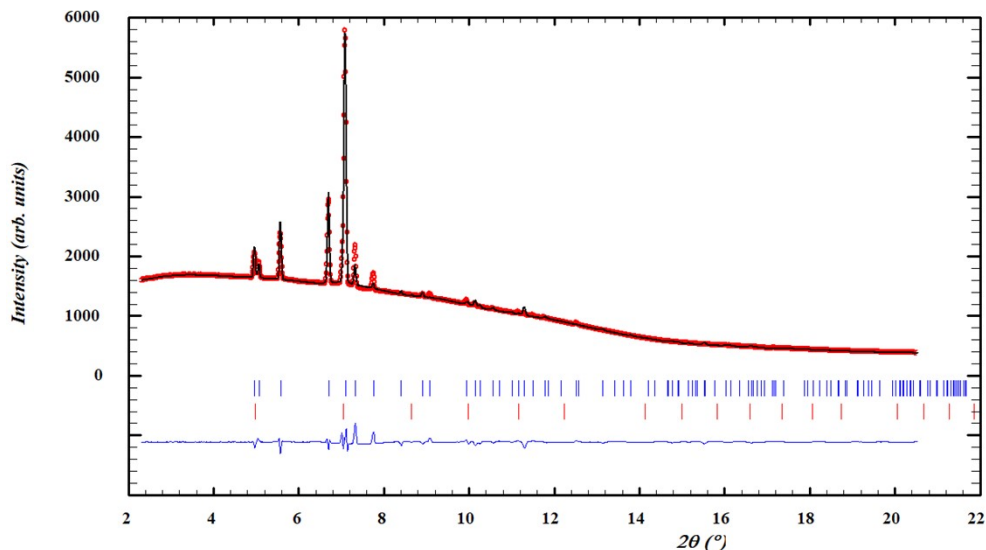

**Figure S7.** Rietveld refinement of the structural model of  $\delta\text{-}[\text{NH}(\text{CH}_3)_3][\text{CB}_9\text{H}_{10}]$  from SR PXRD data measured at  $T = 500\text{ K}$ ,  $\lambda = 0.6063\text{ \AA}$ , showing experimental (red circles) and calculated (black line) PXRD patterns, and a difference plot below (blue line). Blue ticks:  $\gamma\text{-}[\text{NH}(\text{CH}_3)_3][\text{CB}_9\text{H}_{10}]$  (99.6 %), red ticks:  $\delta\text{-}[\text{NH}(\text{CH}_3)_3][\text{CB}_9\text{H}_{10}]$  0.4 %. Final discrepancy factors:  $R_p = 1.06\%$ ,  $R_{wp} = 1.84\%$ ,  $R_{exp} = 0.07\%$  (not corrected for background),  $R_p = 27.4\%$ ,  $R_{wp} = 16.6\%$ ,  $R_{exp} = 0.68\%$  (conventional Rietveld R-factors),  $R_{Bragg}(\gamma\text{-}[\text{NH}(\text{CH}_3)_3][\text{CB}_9\text{H}_{10}]) = 13.2\%$ ,  $R_{Bragg}(\delta\text{-}[\text{NH}(\text{CH}_3)_3][\text{CB}_9\text{H}_{10}]) = 6.40\%$  and global  $\chi^2 = 606$ .

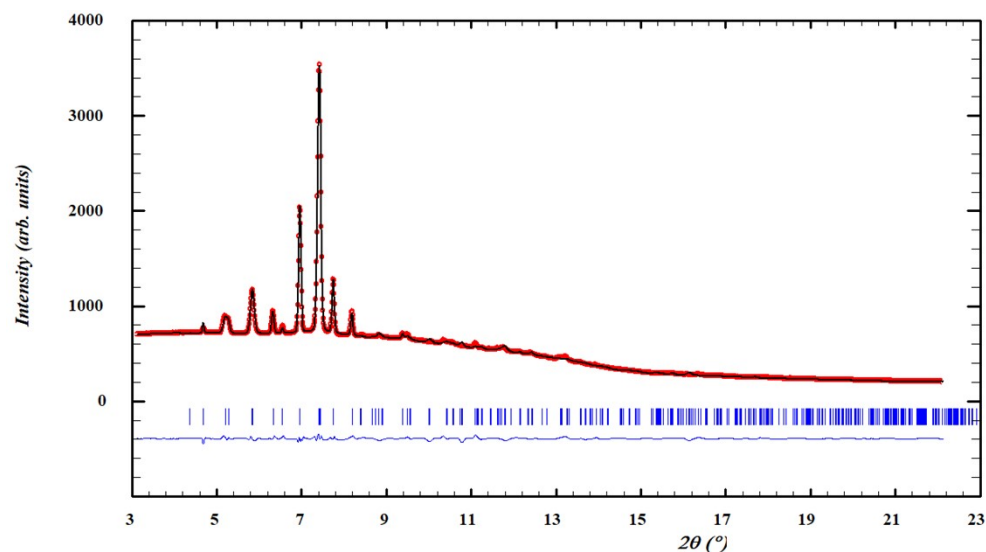

**Figure S8.** Rietveld refinement of the structural model of  $\alpha\text{-}[\text{NH}(\text{CH}_3)_3][(\text{CB}_8\text{H}_9)_{0.26}(\text{CB}_9\text{H}_{10})_{0.66}(\text{CB}_{11}\text{H}_{12})_{0.08}]$  from SR PXRD data measured at  $T = 273\text{ K}$ ,  $\lambda = 0.62028\text{ \AA}$ , showing experimental (red circles) and calculated (black line) PXRD patterns, and

a difference plot below (blue line). Final discrepancy factors:  $R_p = 0.983\%$ ,  $R_{wp} = 1.54\%$ ,  $R_{exp} = 0.10\%$  (not corrected for background),  $R_p = 12.7\%$ ,  $R_{wp} = 9.61\%$ ,  $R_{exp} = 0.65\%$  (conventional Rietveld R-factors),  $R_{Bragg}(\alpha\text{-}[\text{NH}(\text{CH}_3)_3][(\text{CB}_8\text{H}_9)_{0.26}(\text{CB}_9\text{H}_{10})_{0.66}(\text{CB}_{11}\text{H}_{12})_{0.08}]) = 7.16\%$  and global  $\chi^2 = 218$ .

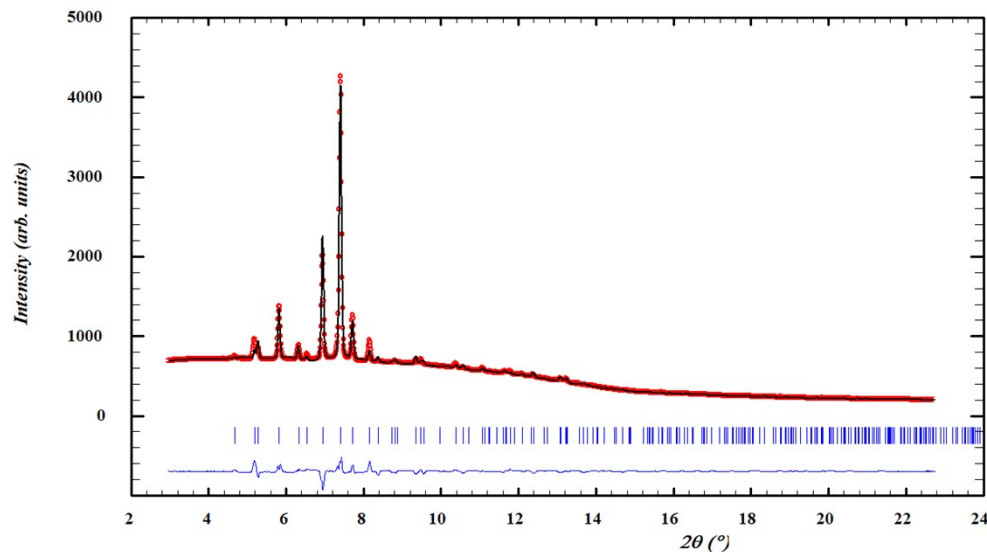

**Figure S9.** Rietveld refinement of the structural model of  $\beta\text{-}[\text{NH}(\text{CH}_3)_3][(\text{CB}_8\text{H}_9)_{0.26}(\text{CB}_9\text{H}_{10})_{0.66}(\text{CB}_{11}\text{H}_{12})_{0.08}]$  from SR PXRD data measured at  $T = 293\text{ K}$ ,  $\lambda = 0.62028\text{ \AA}$ , showing experimental (red circles) and calculated (black line) PXRD patterns, and a difference plot below (blue line). Final discrepancy factors:  $R_p = 1.66\%$ ,  $R_{wp} = 2.40\%$ ,  $R_{exp} = 0.11\%$  (not corrected for background),  $R_p = 22.3\%$ ,  $R_{wp} = 14.8\%$ ,  $R_{exp} = 0.65\%$  (conventional Rietveld R-factors),  $R_{Bragg}(\beta\text{-}[\text{NH}(\text{CH}_3)_3][(\text{CB}_8\text{H}_9)_{0.26}(\text{CB}_9\text{H}_{10})_{0.66}(\text{CB}_{11}\text{H}_{12})_{0.08}]) = 12.4\%$  and global  $\chi^2 = 519$ .

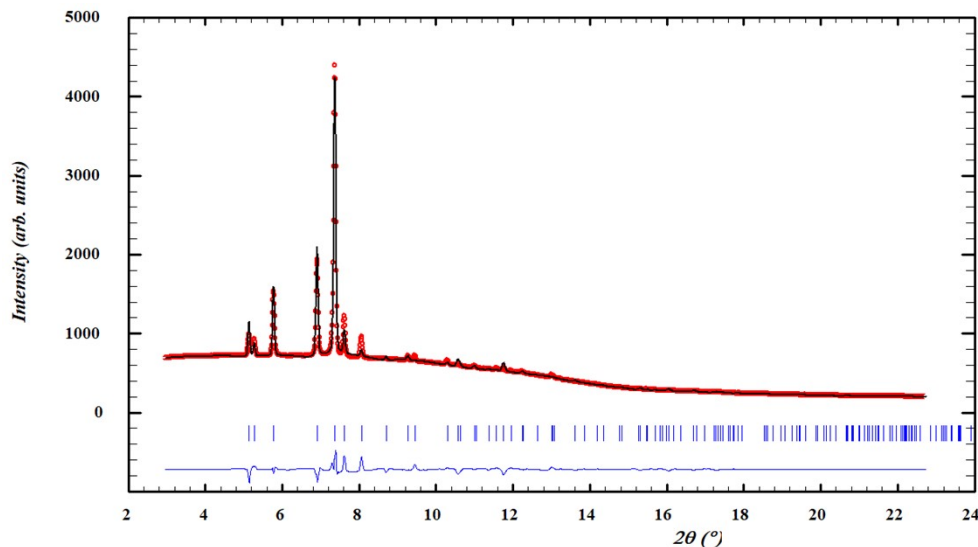

**Figure S10.** Rietveld refinement of the structural model of  $\gamma\text{-}[\text{NH}(\text{CH}_3)_3][(\text{CB}_8\text{H}_9)_{0.26}(\text{CB}_9\text{H}_{10})_{0.66}(\text{CB}_{11}\text{H}_{12})_{0.08}]$  from SR PXRD data measured at  $T = 340\text{ K}$ ,  $\lambda$

= 0.62028 Å, showing experimental (red circles) and calculated (black line) PXRD patterns, and a difference plot below (blue line). Final discrepancy factors:  $R_p = 1.82\%$ ,  $R_{wp} = 2.80\%$ ,  $R_{exp} = 0.11\%$  (not corrected for background),  $R_p = 26.1\%$ ,  $R_{wp} = 17.6\%$ ,  $R_{exp} = 0.66\%$  (conventional Rietveld R-factors),  $R_{Bragg}(\gamma\text{-[NH(CH}_3\text{)}_3\text{)]}[(\text{CB}_8\text{H}_9)_{0.26}(\text{CB}_9\text{H}_{10})_{0.66}(\text{CB}_{11}\text{H}_{12})_{0.08}] = 11.8\%$  and global  $\chi^2 = 710$ .

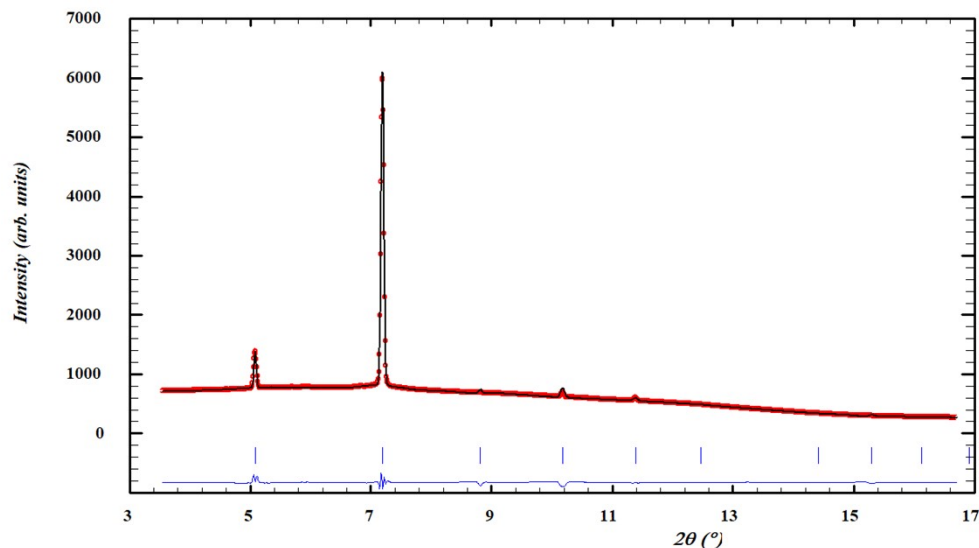

**Figure S11.** Rietveld refinement of the structural model of  $\delta\text{-[NH(CH}_3\text{)}_3\text{)]}[(\text{CB}_8\text{H}_9)_{0.26}(\text{CB}_9\text{H}_{10})_{0.66}(\text{CB}_{11}\text{H}_{12})_{0.08}]$  from SR PXRD data measured at  $T = 500\text{ K}$ ,  $\lambda = 0.62028\text{ Å}$ , showing experimental (red circles) and calculated (black line) PXRD patterns, and a difference plot below (blue line). Final discrepancy factors:  $R_p = 0.931\%$ ,  $R_{wp} = 1.70\%$ ,  $R_{exp} = 0.10\%$  (not corrected for background),  $R_p = 16.2\%$ ,  $R_{wp} = 9.61\%$ ,  $R_{exp} = 0.54\%$  (conventional Rietveld R-factors),  $R_{Bragg}(\delta\text{-[NH(CH}_3\text{)}_3\text{)]}[(\text{CB}_8\text{H}_9)_{0.26}(\text{CB}_9\text{H}_{10})_{0.66}(\text{CB}_{11}\text{H}_{12})_{0.08}] = 1.11\%$  and global  $\chi^2 = 315$ .

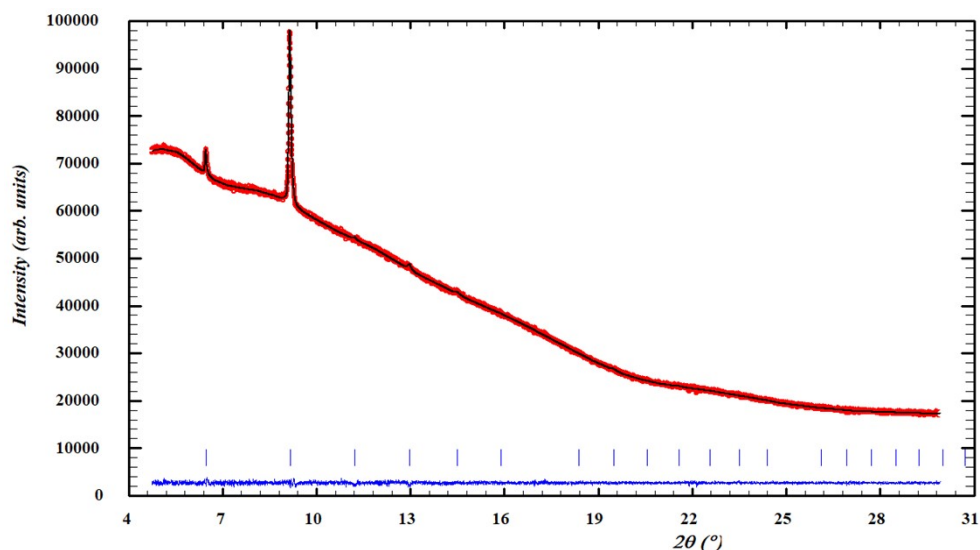



**Figure S12.** Rietveld refinement of the structural model of  $\epsilon$ - $[\text{NH}(\text{CH}_3)_3][(\text{CB}_8\text{H}_9)_{0.26}(\text{CB}_9\text{H}_{10})_{0.66}(\text{CB}_{11}\text{H}_{12})_{0.08}]$  from SR PXRD data measured at  $T = 637 \text{ K}$ ,  $\lambda = 0.826366 \text{ \AA}$ , showing experimental (red circles) and calculated (black line) PXRD patterns, and a difference plot below (blue line). Final discrepancy factors:  $R_p = 0.418 \%$ ,  $R_{wp} = 0.540 \%$ ,  $R_{exp} = 0.52 \%$  (not corrected for background),  $R_p = 67.4 \%$ ,  $R_{wp} = 15.4 \%$ ,  $R_{exp} = 14.89 \%$  (conventional Rietveld R-factors),  $R_{\text{Bragg}}(\epsilon\text{-}[\text{NH}(\text{CH}_3)_3][(\text{CB}_8\text{H}_9)_{0.26}(\text{CB}_9\text{H}_{10})_{0.66}(\text{CB}_{11}\text{H}_{12})_{0.08}]) = 2.81 \%$  and global  $\chi^2 = 1.13$ .

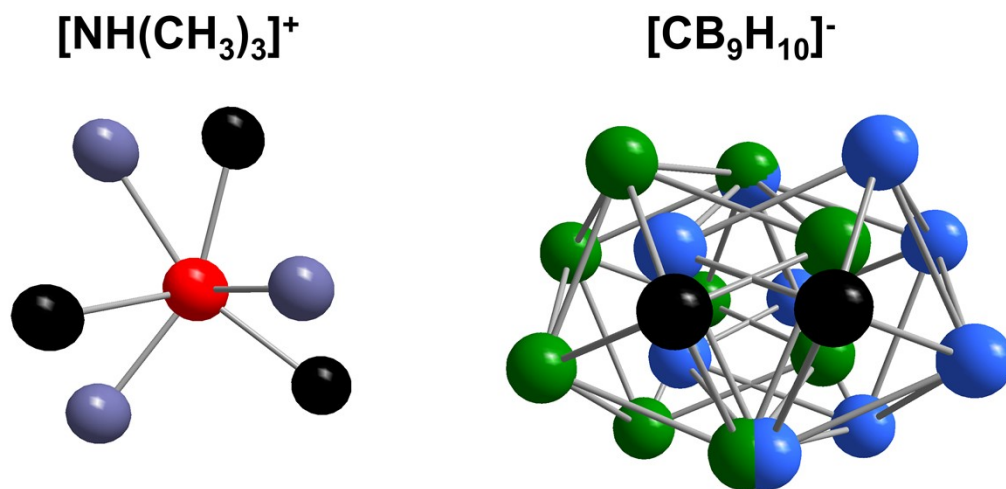

**Figure S13.** Disorder in  $\beta$ - and  $\gamma$ - $[\text{NH}(\text{CH}_3)_3][\text{CB}_9\text{H}_{10}]$  is observed for both the  $\gamma$ - $[\text{NH}(\text{CH}_3)_3]^+$  cation and the  $[\text{CB}_9\text{H}_{10}]^-$ , around a mirror-plane symmetry element with 50 % occupancy for each unit. Color scheme: B (blue/green), C (black/purple). N (red). H is omitted for clarity.

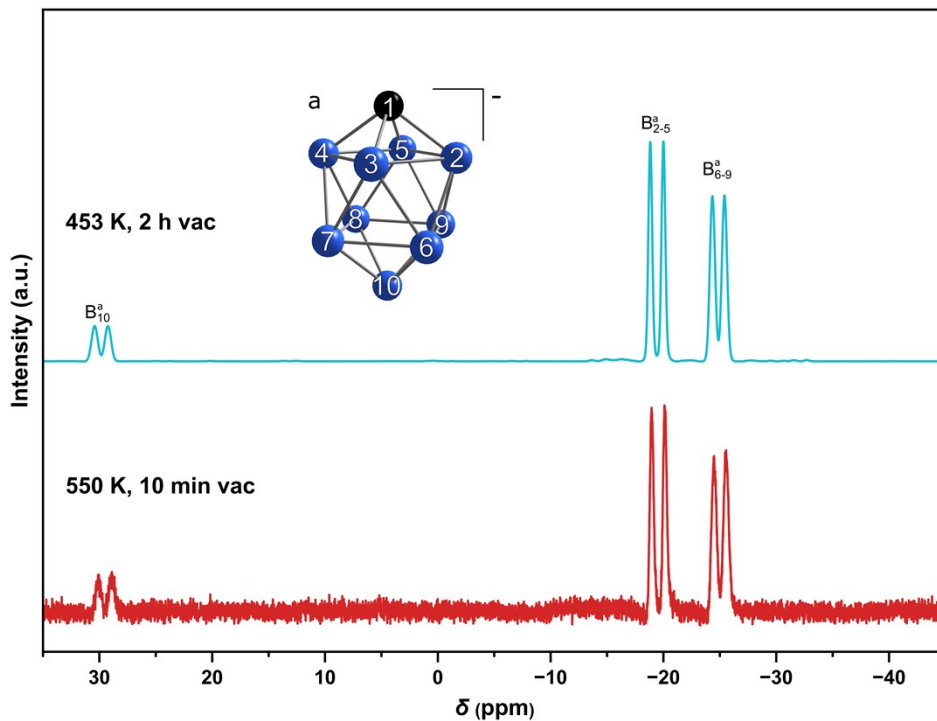



**Figure S14.**  $^{11}\text{B}$  NMR spectra of  $[\text{NH}(\text{CH}_3)_3][\text{CB}_9\text{H}_{10}]$  heated to  $T = 453$  and  $550$  K for 2 hours under dynamic vacuum.
